# Supplementary material for: Alteration of gut microbiota in type 2 diabetes complicated with cholelithiasis patients
Source: PubMed Central journal article supplement — Chin Med J (Engl). 2022 Oct 18;135(17):2125–7. doi: 10.1097/CM9.0000000000002102 (PMC9746767; doi:10.1097/cm9.0000000000002102), 2022-10-18
Supplement: cm9-135-2125-s001.pdf [file cm9-135-2125-s001.pdf]

**Table S1. Characteristics of clinical samples and data.**

| Characteristics               | Health<br>(n=33) | Diabetes<br>(n=53) | Stones<br>(n=31) | Diastone<br>(n=32) | Significant           |
|-------------------------------|------------------|--------------------|------------------|--------------------|-----------------------|
| Age                           | 51.0±4.5         | 61.6±9.7           | 60.1±11.0        | 59.5±7.8           | Nonsense <sup>1</sup> |
| Male                          | 17 (51.5)        | 29 (54.7)          | 8 (25.8)         | 14 (43.8)          | -                     |
| Total OTUs/group              | 2232             | 2246               | 1971             | 2009               | -                     |
| ALT (U/L)                     | -                | 16.00±10.86        | 17.00±13.48      | 29.13±16.77        | Sense <sup>2a</sup>   |
| AST (U/L)                     | -                | 17.150±6.529       | 22.580±11.210    | 22.190±9.299       | Sense <sup>2b</sup>   |
| Blood glucose (mmol/L)        | -                | 9.714±3.242        | 5.666±2.223      | 10.45±3.163        | Sense <sup>2c</sup>   |
| Total cholesterol<br>(mmol/L) | -                | 4.257±1.079        | 4.643±0.754      | 4.802±1.009        | Nonsense <sup>2</sup> |
| Triglyceride (mmol/L)         | -                | 1.769±1.276        | 1.297±0.495      | 2.717±2.449        | Sense <sup>2d</sup>   |
| Total bile acids (umol/l)     | -                | -                  | 3.244±1.899      | 5.641±2.625        | Sense <sup>2</sup>    |

Data are presented as *n*, *n* (%) or mean ± standard deviation

1: AMOVA, 2: Kruskal-Wallis nonparametric test. \**P* < 0.05 †*P* < 0.01.

a: Diastone vs. Diabetes †

b: Diastone vs. Diabetes †, Stones vs. Diabetes \*

c: Diastone vs. Stones †, Stones vs. Diabetes †

d: Diastone vs. Diabetes \*, Diastone vs. Stones †

**Table S2. Associations between clinical characteristics and gut microbiota.**

| Characteristics   | Gut microbiota                         | Spearman's rho      | p-Value |
|-------------------|----------------------------------------|---------------------|---------|
| Blood glucose     | <i>Fusobacteria</i>                    | -0.371 <sup>†</sup> | <0.0001 |
|                   | <i>Tenericutes</i>                     | 0.272 <sup>†</sup>  | 0.0060  |
|                   | <i>Oxyphotobacteria</i>                | 0.344 <sup>†</sup>  | <0.0001 |
|                   | <i>Bacteroides</i>                     | -0.271 <sup>†</sup> | 0.0060  |
|                   | <i>Faecalibacterium</i>                | -0.276 <sup>†</sup> | 0.0050  |
|                   | <i>Roseburia</i>                       | -0.300 <sup>†</sup> | 0.0020  |
| Total cholesterol | <i>Proteobacteria</i>                  | -0.209*             | 0.0400  |
|                   | <i>Actinobacteria</i>                  | -0.200*             | 0.0500  |
|                   | <i>Megamonas</i>                       | -0.231*             | 0.0230  |
|                   | <i>Unidentified Enterobacteriaceae</i> | -0.296 <sup>†</sup> | 0.0030  |
| Triglyceride      | <i>Faecalibacterium</i>                | -0.236*             | 0.0200  |
| Total bile acid   | <i>Tenericutes</i>                     | 0.353*              | 0.0350  |

The top 10 phylum and genera were analyzed, the results with statistically significant were shown in the table.

\* $P < 0.05$  † $P < 0.01$ .

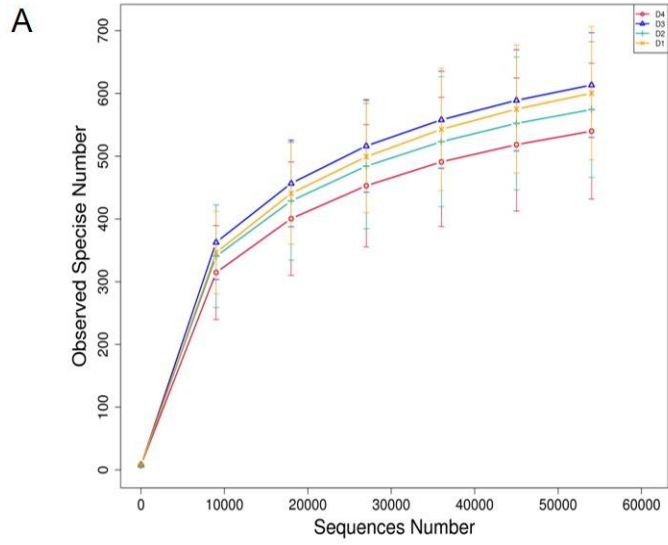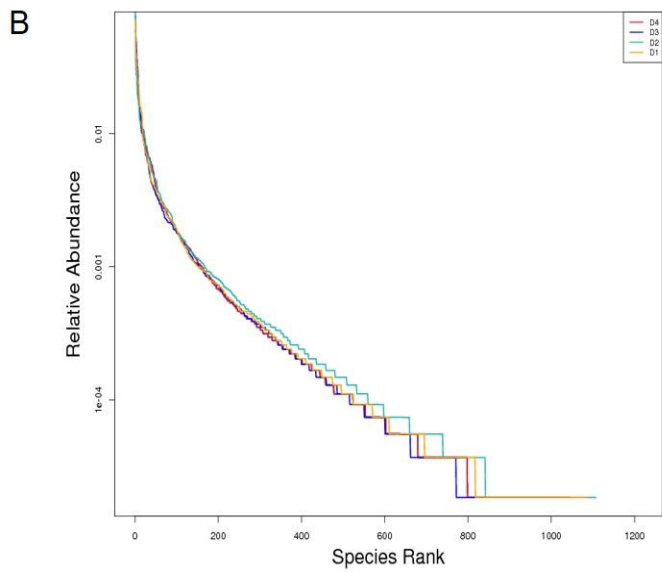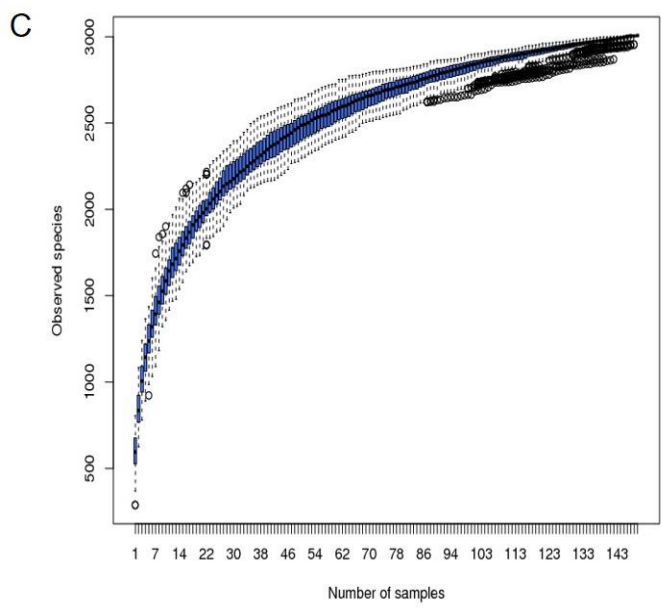

**Figure S1. Quality analysis of sequencing data.** A: Rarefaction curve was drawn to evaluate whether the sequencing depth of each sample was enough to reflect the microbial diversity, which directly reflects the rationality of the amount of sequencing data, and indirectly reflects the species richness of sample. When the curve tended to be flat, the sequencing depth was gradually reasonable. More data will only produce a small number of new species (OTUs). B: Rank abundance curve visually reflects the species richness and evenness of sample. In horizontal direction, the curve width reflects the species richness. In vertical direction, the curve smoothness reflects the species evenness. The flatter the curve, the more even of the species distribution. C: Species accumulation curve was drawn to evaluate whether the sample size was enough. The abscissa is sample size, the ordinate is number of OTUs after sampling. In a certain range, many species can be found in the community if the location of box plot shows a sharp rise along with the increase of sample size. When the location of box plot flattening out, the species will not significantly increase along with an increasing sample size.

D1: Healthy group; D2: Diabetes group; D3: Stones group; D4: Diastone group.

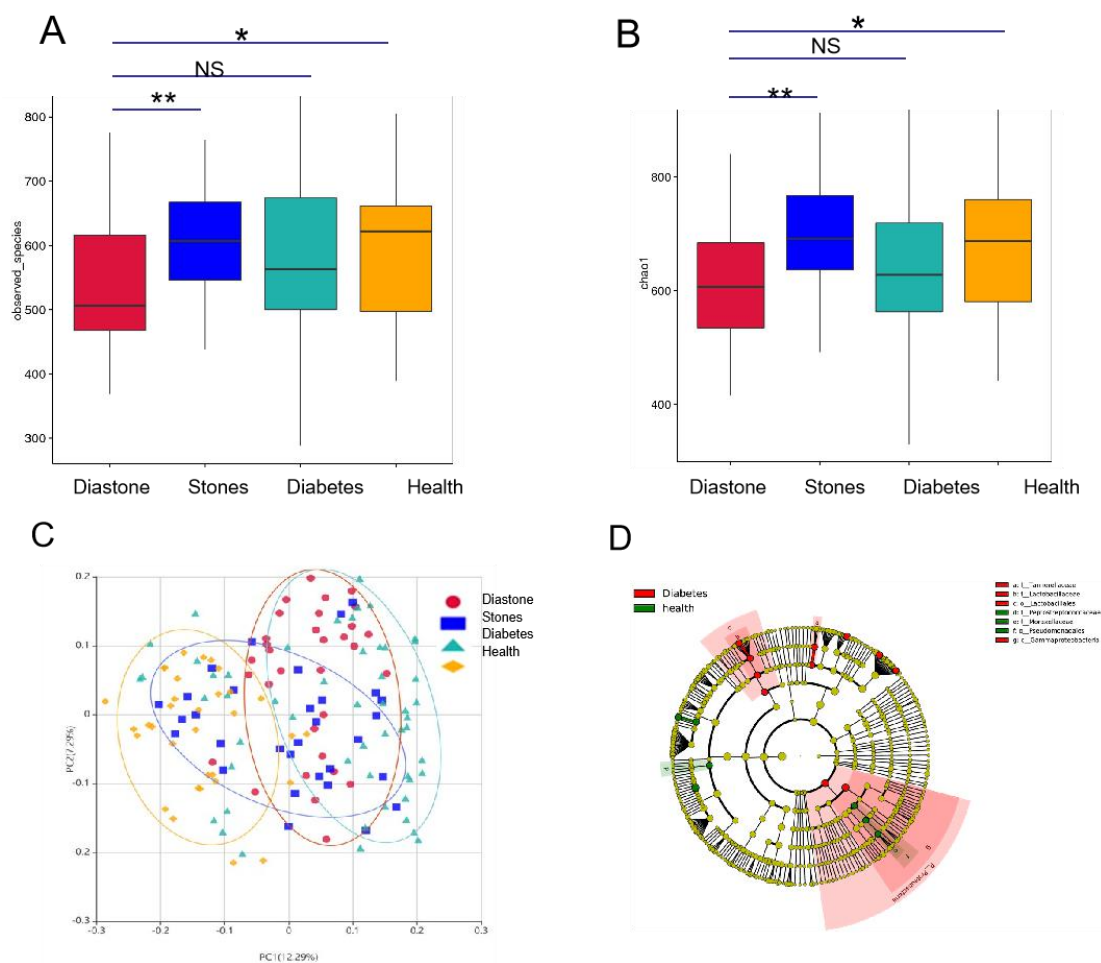

**Figure S2 The gut microbial characteristics among 4 groups.**

A. The observed species among 4 groups.

B. B. The chao indexes among 4 groups.

C. PcoA analysis in 4 groups.

D. LEfSe analysis between Health group and Diabetes group.

(Wilcoxon rank-sum test,  $*P < 0.05$ ,  $\dagger P < 0.01$ ; NS: Nonsense, LDA score:3.5)

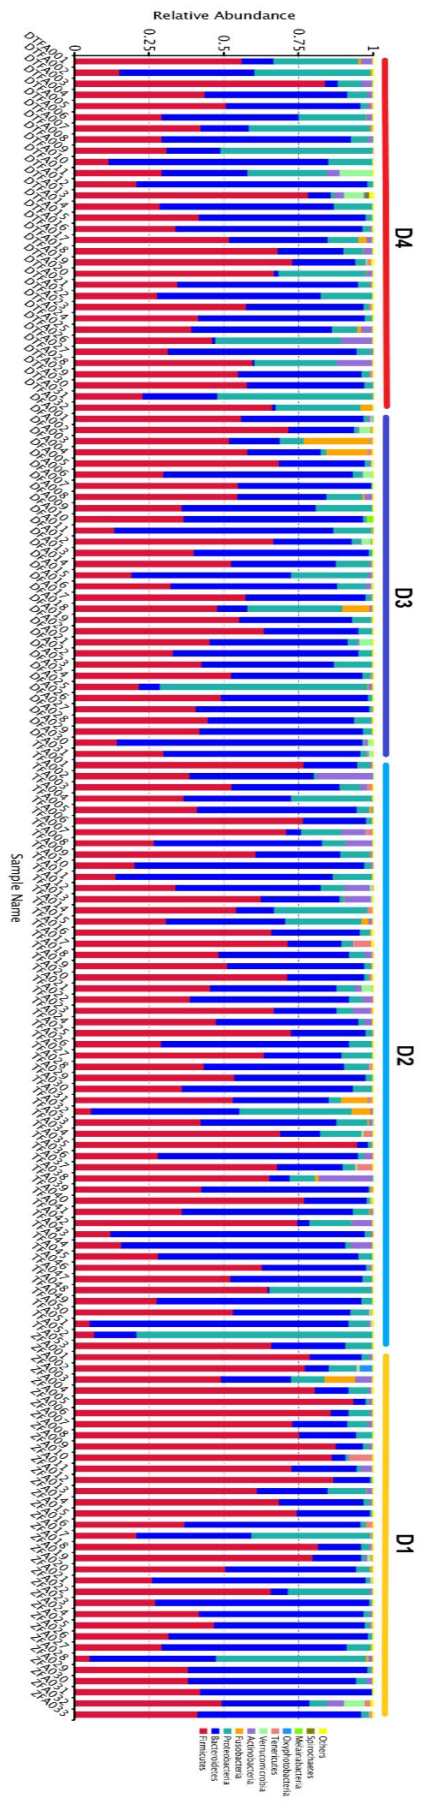

**Figure S3. Relative abundance of species at the phylum level.** The top 10 species with the highest abundance at phylum level were selected. A column-like cumulative graph of the relative abundance of species was generated to visually view the relative abundance of species and their proportions for all samples.

D1: Healthy group, ZFA001-033; D2: Diabetes group, TFA001-053; D3: Stones group, DFA001-031; D4: Diastone group, DTFA001-032.
